# Supplementary material for: Morbidity and Mortality Associated With Medications Used in the Treatment of Depression: An Analysis of Cases Reported to U.S. Poison Control Centers, 2000–2014
Source: Atypon-hosted journal article supplement (doi:10.1176/appi.ajp.2016.16050523), 2017-01-31
Supplement: appi.ajp.2016.16050523.ds001.pdf [file appi.ajp.2016.16050523.ds001.pdf]

Data supplement for Nelson and Spyker, Morbidity and Mortality Associated With Medications Used in the Treatment of Depression: An Analysis of Cases Reported to U.S. Poison Control Centers, 2000–2014. Am J Psychiatry (doi: 10.1176/appi.ajp.2016.16050523)

## Supplemental Materials

### Table of Contents

|                                                                                       |    |
|---------------------------------------------------------------------------------------|----|
| Supplemental Material 1 – Details of Medication Extraction.....                       | 1  |
| Generic Codes Extracted (N=50).....                                                   | 1  |
| Drug Groups (N=10).....                                                               | 3  |
| Drug List (N=59).....                                                                 | 3  |
| Supplemental Material 2 – Details of selection of age threshold and reason/intent.... | 3  |
| Age.....                                                                              | 3  |
| Reason/Intent.....                                                                    | 4  |
| Supplement Material 3 – Correction for Less Serious Calls.....                        | 6  |
| More Serious Exposures – Linear Model.....                                            | 6  |
| Less Serious Exposures – Spline Model.....                                            | 7  |
| Correction for Less Serious Exposures.....                                            | 8  |
| Supplemental Material 4 – Clinical Effects of Medications.....                        | 10 |

### Supplemental Material 1 – Details of Medication Extraction

Supplemental Material 1 describes the extraction and translation of the NPDS encounter data to the final 59 individual drugs carried out in this study

#### Generic Codes Extracted (N=50)

| <u>Generic Code Name</u> .....                  | <u>Generic Code</u> |
|-------------------------------------------------|---------------------|
| Amitriptyline .....                             | 66731               |
| Amoxapine.....                                  | 66732               |
| Antidepressants: Type Unknown to Consumer ..... | 77732               |
| Atypical Antipsychotics .....                   | 201122              |
| Benzodiazepines .....                           | 7000                |
| Bupropion .....                                 | 310019              |
| Buspirone.....                                  | 201123              |
| Carbamazepine .....                             | 249000              |
| Citalopram .....                                | 310009              |
| Clomipramine .....                              | 310003              |
| Desipramine.....                                | 66733               |
| Doxepin .....                                   | 66734               |
| Duloxetine .....                                | 310017              |
| Escitalopram .....                              | 310010              |
| Fluoxetine .....                                | 310011              |
| Fluvoxamine .....                               | 310012              |
| Gabapentin.....                                 | 201172              |
| Imipramine.....                                 | 66735               |
| Isocarboxazid.....                              | 310005              |
| Lamotrigine .....                               | 201173              |

|                                                                              |          |
|------------------------------------------------------------------------------|----------|
| Lithium .....                                                                | 101000   |
| Loxapine .....                                                               | 310002   |
| Maprotiline .....                                                            | 66736    |
| Mirtazapine .....                                                            | 310001   |
| Nefazodone .....                                                             | 310015   |
| Nortriptyline .....                                                          | 66737    |
| Other Types of Antidepressant .....                                          | 77731    |
| Other Types of Gamma Aminobutyric Acid Anticonvulsant .....                  | 201178   |
| Other Types of Monoamine Oxidase Inhibitor (MAOI) .....                      | 168000   |
| Other Types of Sedative/Hypnotic/Anti-Anxiety or Anti-Psychotic Drug.....    | 77941    |
| Other Types of Selective Serotonin Reuptake Inhibitor (SSRI) .....           | 66744    |
| Other Types of Serotonin Norepinephrine Reuptake Inhibitor (SNRI) .....      | 310018   |
| Other Types of Tricyclic Antidepressant (TCA) .....                          | 66741    |
| Oxcarbazepine .....                                                          | 201176   |
| Paroxetine .....                                                             | 310013   |
| Phenelzine.....                                                              | 310006   |
| Phenothiazines .....                                                         | 75000    |
| Protriptyline .....                                                          | 66738    |
| Selegiline .....                                                             | 310008   |
| Sertraline.....                                                              | 310014   |
| Topiramate.....                                                              | 201174   |
| Tranlycypromine .....                                                        | 310007   |
| Trazodone .....                                                              | 66743    |
| Tricyclic Antidepressants (TCA) Formulated with a Benzodiazepine .....       | 66739    |
| Tricyclic Antidepressants (TCA) Formulated with a Phenothiazine.....         | 66740    |
| Tricyclic Antidepressants (TCA): Type Unknown to Consumer .....              | 66742    |
| Trimipramine .....                                                           | 310004   |
| Unknown Types of Anticonvulsant (Excluding Barbiturates).....                | excluded |
| Unknown Types of Sedative/Hypnotic/Anti-Anxiety or Anti-Psychotic Drug ..... | 77940    |
| Valproic Acid .....                                                          | 260000   |
| Venlafaxine.....                                                             | 310016   |
| Other Types of Anticonvulsant (Excluding Barbiturates) .....                 | excluded |
| Sleep Aids, Over the Counter Only (Excluding Diphenhydramine) .....          | excluded |
| Zonisamide .....                                                             | excluded |

All of the substances extracted from the above 50 Generic Codes included 4517 distinct product (or generic) codes were mapped to the 10 drug groups and 59 drugs listed below

## Drug Groups (N=10)

| Num | GROUP                   |
|-----|-------------------------|
| 1   | TCA's                   |
| 2   | MAOIs                   |
| 3   | SSRIs                   |
| 4   | SNRIs                   |
| 5   | Other Antidepressants   |
| 6   | Atypical Antipsychotics |
| 7   | Lithium                 |
| 8   | Anticonvulsants         |
| 9   | Combination Agents      |
| 10  | Other Medications       |

Anticonvulsants, Atypical Antipsychotics, Combination Agents, Lithium, MAOIs, Other Antidepressants, Other Medications, SNRIs, SSRIs, TCAs

## Drug List (N=59)

Here's an alphabetical list of the 59 drugs studied.

amitriptyline, amoxapine, aripiprazole, asenapine, benzodiazepines, bupropion, buspirone, carbamazepine, chlorpromazine, citalopram, clomipramine, clozapine, desipramine, desvenlafaxine, doxepin, droperidol, duloxetine, escitalopram, fluoxetine, fluphenazine, fluvoxamine, gabapentin, haloperidol, iloperidone, imipramine, lamotrigine, lithium, loxapine, lurasidone, maprotiline, milnacipran, mirtazapine, molindone, nefazodone, nortriptyline, olanzapine, olanzapine + fluoxetine, oxcarbazepine, paliperidone, paroxetine, perphenazine, perphenazine + amitriptyline, phenelzine, pimozide, pregabalin, protriptyline, quetiapine, risperidone, selegiline, sertraline, thioridazine, thiothixene, tranylcypromine, trazodone, trifluoperazine, valproic acid, venlafaxine, vilazodone, ziprasidone

## Supplemental Material 2

### Limits on Antidepressant Exposures based on Age and Intent

We considered whether to limit the sample to those over a certain age or based on reason for the exposure, such as suicide. The rationale for the age limit was knowledge that many exposures in children are accidental and our aim in this study was to determine the morbidity and mortality associated with medications used during treatment of depression.

**Age.** We examined 3 different age thresholds,  $\geq 12$  years,  $\geq 16$  yrs,  $\geq 20$  yrs (Table 2.1). We did not consider a lower age threshold since we were principally interested in the therapeutic use and intentional overdose of these agents. We noted Cochran's Q increased slightly as age decreased from 20 to 16 and 16 to 12, but the increase was larger when children under 12 were included. Similarly the pooled morbidity index changed slightly from 20 to 16 to 12 but with inclusion of children under 12, the index dropped substantially. These data suggested that the group under 12 differed from the larger group and that a threshold of  $\geq 12$  was most appropriate. This is consistent with the AAPCC annual report which found that the frequency of intentional

exposures in children under 12 years was 1% but jumped to 58% in the 13 to 19 age group. Based on these data we excluded from our sample children under the age of 12.

Table 2.1

| Analysis group | Cochran Q* | Pooled Morbidity Index | Between Drug groups variance* | Number of Exposures | Mean of Indices (N=11)** |
|----------------|------------|------------------------|-------------------------------|---------------------|--------------------------|
| All Ages       | 51,278     | 136                    | 43.7                          | 1,439,710           | 163                      |
| ≥ 12 y/o       | 40,969     | 171                    | 46.9                          | 1,069,195           | 197                      |
| ≥ 16 y/o       | 39,830     | 173                    | 50.0                          | 978,079             | 200                      |
| ≥ 20 y/o       | 36,893     | 175                    | 53.7                          | 844,685             | 200                      |
| Suicide        | 29,895     | 222                    | 65.3                          | 569,678             | 271                      |

\*From Forest Plot analysis (Stats Direct)

\*\*Arithmetic mean of Morbidity Indices for 11 drug groups

**Reason for the exposure.** The reasons for the medication exposure in NPDS includes suspected suicide, and a variety of other possible reasons. We considered whether to include all reasons (in those ≥ 12 years) or limit to suspected suicide. Our considerations were the following.

1. Our aim was to determine the morbidity and mortality of medications used in the treatment of depression.
2. An appreciable number, 1/3 of serious outcomes and 1/4 of fatal outcomes, occur following exposures that are not related to suicide. (see page 8 of the manuscript).
3. A comparison of morbidity indices for 11 drug groups (figures 2.1 and 2.2) suggests that relative morbidity risk between drug groups is minimally affected by limiting reason for the exposure to suicide with the possible exception of lithium and MAOIs. (The 11 medications or drug groups included the 10 drug groups cited above. In this analysis ‘other agents’ and ‘buspirone’ were examined separately).
4. Excluding exposures not related to suicide reduces the total number of exposures by 48%. As we divide these data among the individual drugs, the larger number of exposures for the ≥12 y/o subset with reason = all provides greater statistical power for distinguishing differences between medications. This is especially important for the newer drugs.

**Figure 2.1 Forest Plot – 12 y/o and older, exposures for all reasons**  
 Cochran Q = 40969.351837 (df = 10) P < 0.0001

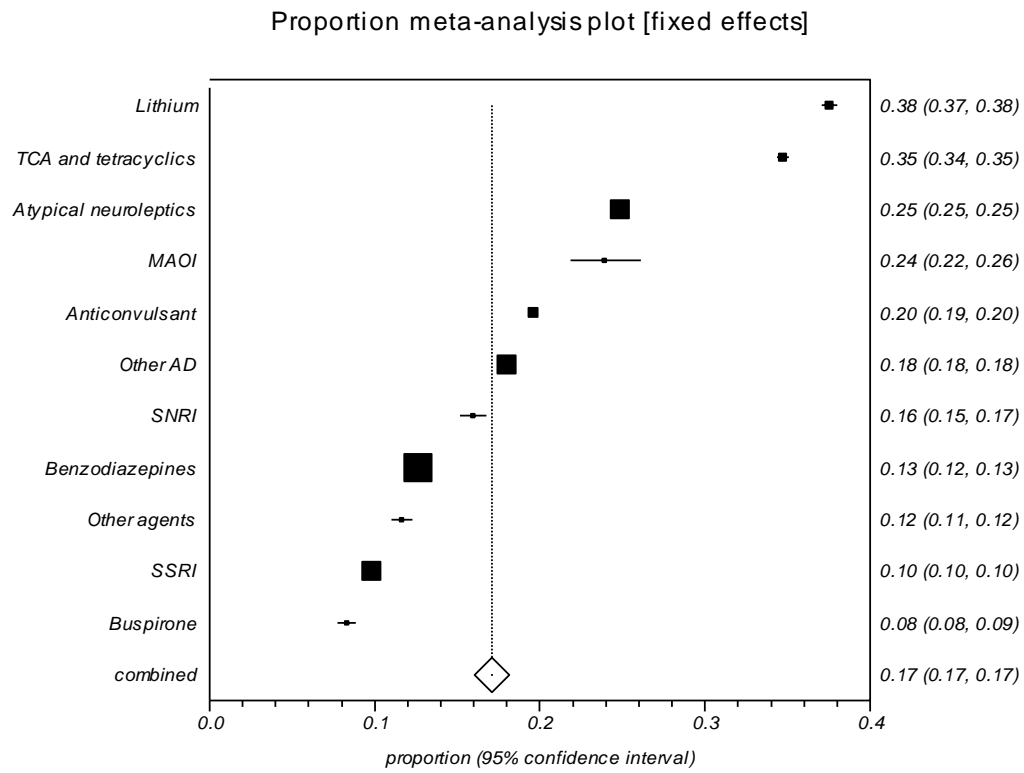

**Figure 2.2 Forest Plot – 12 y/o and older, exposures limited to suspect suicide**

Cochran Q = 29895.399941 (df = 10) P < 0.0001

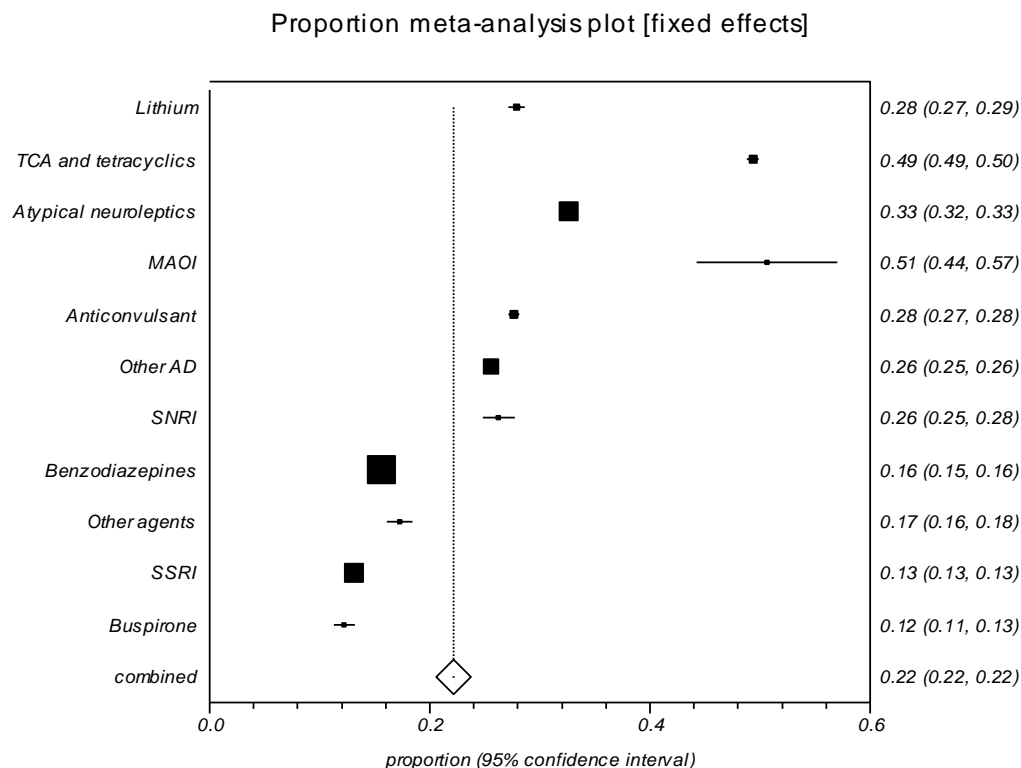

### Supplemental Material 3 – Correction for Less Serious Calls

Since approximately 2008, the number of Less Serious Exposures per year reported to US poison centers has decreased despite a consistent increase in the number of More Serious Exposures (Outcome = Major, Moderate or Death). Since we wished to use all exposure data from 2000-2014 and the exposures to each drug had a different exposure profile over time, we needed to correct for this decline in Less Serious Exposures per year.

### More Serious Exposures – Linear Model

We calculated the number of More Serious and Less Serious outcomes by year based on our 48 medication subset (single substance human exposures, age 12 and older), N=962,222. Figure 2.1 shows the linear regression for the More Serious cases (solid line) with the 95% CI on the regression fit. Thus the More Serious cases from 2000 through 2014 exhibited a consistent increase.

**Figure 2.1 Fit of More Serious Exposures by Year**

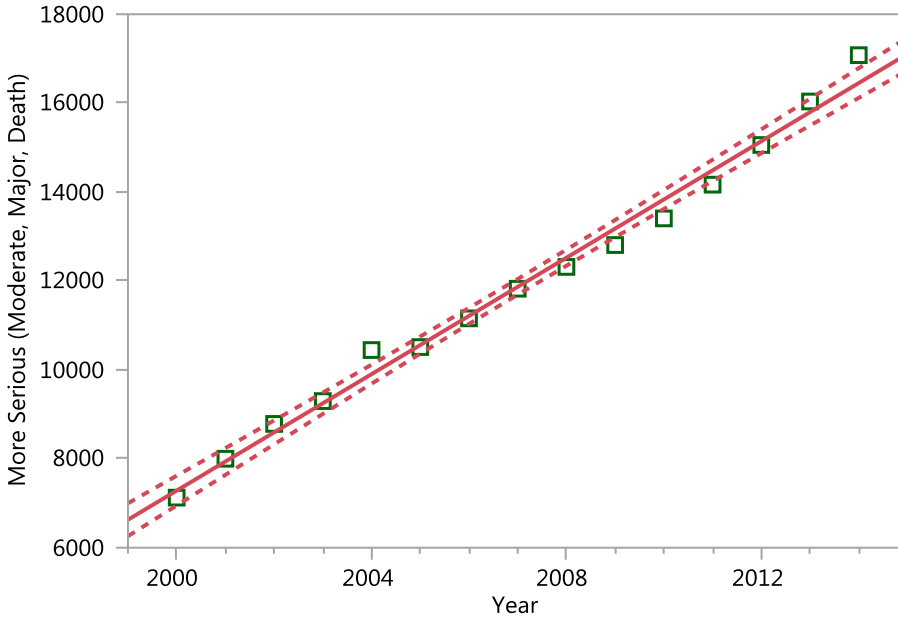

**Linear Fit**

More Serious = -1302423 + 654.85357\*Year

**Summary of Fit**

|                            |          |
|----------------------------|----------|
| RSquare                    | 0.989368 |
| RSquare Adj                | 0.98855  |
| Root Mean Square Error     | 315.0534 |
| Mean of Response           | 11868.2  |
| Observations (or Sum Wgts) | 15       |

**Analysis of Variance**

| Source   | DF | Sum of Squares | Mean Square | F Ratio            |
|----------|----|----------------|-------------|--------------------|
| Model    | 1  | 120073296      | 120073296   | 1209.701           |
| Error    | 13 | 1290362        | 99258.646   | <b>Prob &gt; F</b> |
| C. Total | 14 | 121363658      |             | <.0001*            |

**Parameter Estimates**

| Term      | Estimate  | Std Error | t Ratio | Prob> t | Lower 95% | Upper 95% |
|-----------|-----------|-----------|---------|---------|-----------|-----------|
| Intercept | -1302423  | 37787.97  | -34.47  | <.0001* | -1384059  | -1220787  |
| Year      | 654.85357 | 18.82804  | 34.78   | <.0001* | 614.17806 | 695.52908 |

**Less Serious Exposures – Spline Model**

Figure 2.2 shows the Less Serious cases which clearly depart from linearity. The redline shows a spline fit which was chosen to describe the overall change without undue sensitivity to the year to year variability.

**Figure 2.2 Spline Fit of Less Serious By Year**

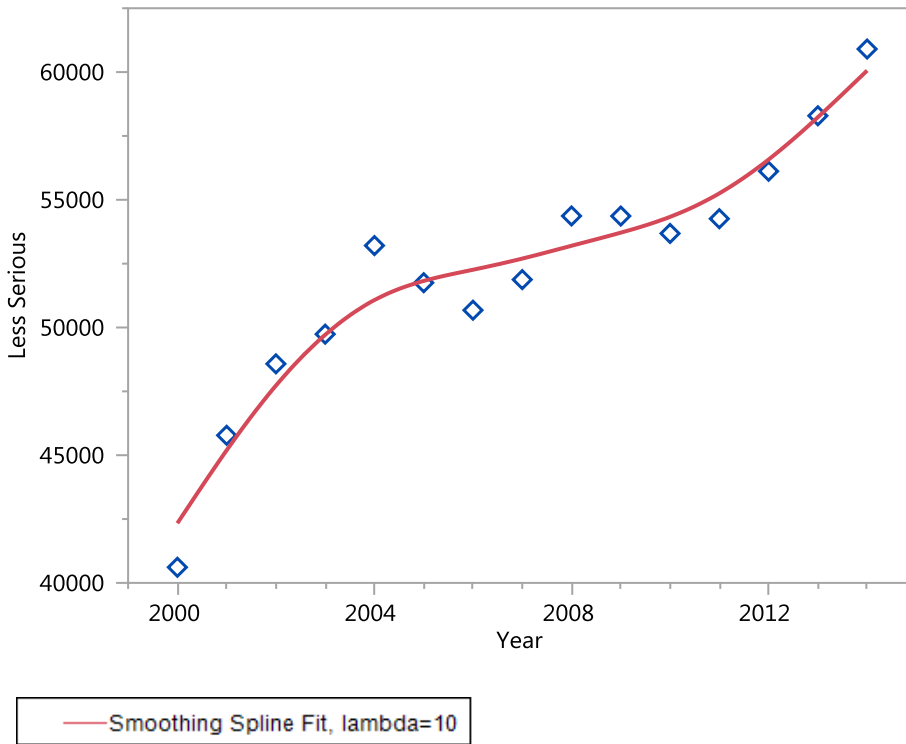

**Smoothing Spline Fit, lambda=10**

R-Square 0.953551  
Sum of Squares Error 15895252

**Correction to Less Serious Exposures**

We calculated the correction from the change from baseline (Year – 2000) in the More Serious and Less Serious exposures:

$$\text{Less Serious Correction} = \text{More Serious change from 2000} / \text{Less Serious change from 2000}$$



**Figure 2.3 Plot of Change from 2000 in More Serious & Less Serious and Correction by Year**

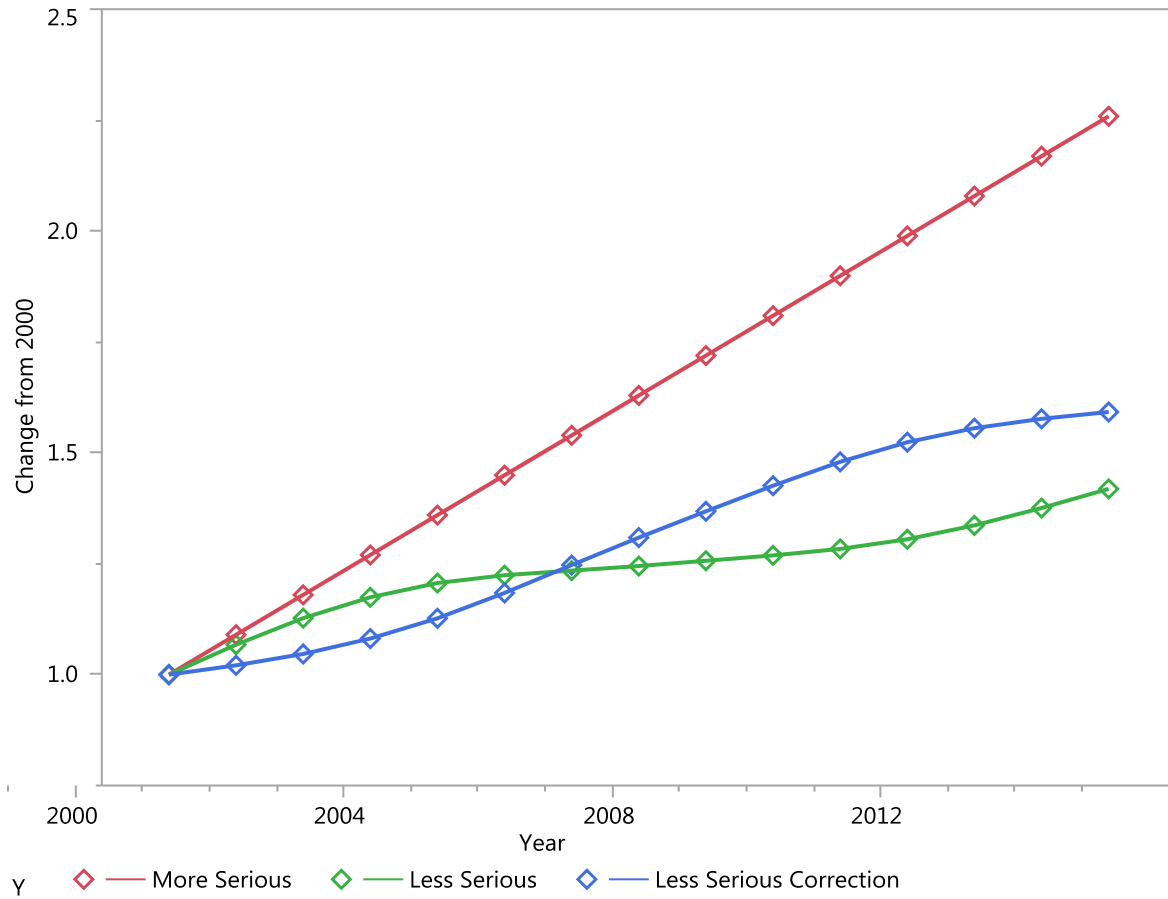

Thus our Less Serious Correction applied a factor to each year of the Less Serious exposures to give the same growth profile as the More Serious exposures. The Correction Summary Table below shows the numerical values for each year.

## Correction Summary Table

| Year | Model Change from 2000 |             |            | Exposures per year |       |          |             |             |       |                   | Model Fit   |             |
|------|------------------------|-------------|------------|--------------------|-------|----------|-------------|-------------|-------|-------------------|-------------|-------------|
|      | More Severe            | Less Severe | Correction | Death              | Major | Moderate | More Severe | Less Severe | Total | Total - Corrected | More Severe | Less Severe |
| 2000 | 1.0000                 | 1.0000      | 1.0000     | 44                 | 1140  | 5942     | 7126        | 40612       | 47738 | 47738             | 7284        | 42335       |
| 2001 | 1.0899                 | 1.0675      | 1.0210     | 36                 | 1233  | 6732     | 8001        | 45779       | 53780 | 54740             | 7939        | 45193       |
| 2002 | 1.1798                 | 1.1273      | 1.0465     | 44                 | 1350  | 7390     | 8784        | 48577       | 57361 | 59622             | 8594        | 47726       |
| 2003 | 1.2697                 | 1.1743      | 1.0812     | 34                 | 1374  | 7890     | 9298        | 49739       | 59037 | 63077             | 9249        | 49715       |
| 2004 | 1.3596                 | 1.2064      | 1.1270     | 45                 | 1461  | 8940     | 10446       | 53207       | 63653 | 70408             | 9904        | 51075       |
| 2005 | 1.4495                 | 1.2241      | 1.1841     | 48                 | 1532  | 8933     | 10513       | 51753       | 62266 | 71794             | 10558       | 51824       |
| 2006 | 1.5394                 | 1.2345      | 1.2470     | 43                 | 1634  | 9482     | 11159       | 50677       | 61836 | 74354             | 11213       | 52262       |
| 2007 | 1.6293                 | 1.2448      | 1.3089     | 58                 | 1556  | 10211    | 11825       | 51875       | 63700 | 79725             | 11868       | 52698       |
| 2008 | 1.7192                 | 1.2566      | 1.3681     | 57                 | 1585  | 10674    | 12316       | 54367       | 66683 | 86695             | 12523       | 53200       |
| 2009 | 1.8091                 | 1.2688      | 1.4259     | 47                 | 1665  | 11096    | 12808       | 54363       | 67171 | 90323             | 13178       | 53714       |
| 2010 | 1.8990                 | 1.2834      | 1.4797     | 52                 | 1611  | 11744    | 13407       | 53682       | 67089 | 92840             | 13833       | 54332       |
| 2011 | 1.9889                 | 1.3051      | 1.5239     | 45                 | 1622  | 12499    | 14166       | 54258       | 68424 | 96851             | 14488       | 55253       |
| 2012 | 2.0788                 | 1.3364      | 1.5555     | 51                 | 1838  | 13169    | 15058       | 56118       | 71176 | 102351            | 15142       | 56577       |
| 2013 | 2.1687                 | 1.3755      | 1.5766     | 58                 | 1826  | 14153    | 16037       | 58289       | 74326 | 107937            | 15797       | 58234       |
| 2014 | 2.2586                 | 1.4187      | 1.5920     | 62                 | 1991  | 15026    | 17079       | 60903       | 77982 | 114039            | 16452       | 60061       |

### Supplemental Material 4 – Clinical Effects by Medication

Supplemental Material 4 provides a complete tabulation of the Clinical Effects by individual medication (drug and combination medications). NPDS includes reports of medical events associated with each exposure from a standard list of 130 clinical events. We examined the rate of medical events (as a percentage of cases) in exposures resulting in serious outcomes. Twenty-one medical events were excluded (we did not include the event category “other,” “puncture wounds” which were unlikely medication related, or medical events for which the highest rate on any single medication was less than 0.15 %). Medical events were grouped by 8 body systems according to the AAPCC classification system.

**(see attached .xlsx)**
